# Supplementary material
Source: PubMed Central journal article supplement (PMC3648042)

**Overlap in phenotypes controlled by the cyclic di-GMP phosphodiesterase Eal in response to antibiotic exposure and DSF-mediated cell-cell signaling in *Xylella fastidiosa***

Alessandra A. de Souza<sup>1,2,§</sup>, Michael Ionescu<sup>1,§</sup>, Clelia Baccari<sup>1</sup>, Aline M. da Silva<sup>3</sup> and Steven E. Lindow<sup>1,†</sup>

<sup>1</sup> Department of Plant and Microbial Biology, University of California, Berkeley, California 94720, USA.

<sup>2</sup> Centro APTA Citros Sylvio Moreira – Instituto Agronômico de Campinas, Caixa Postal 04, Cordeirópolis, SP 13490-970, Brazil .

<sup>3</sup> Departamento de Bioquímica, Instituto de Química, Universidade de São Paulo, São Paulo, SP 05508-000, Brazil.

§ Both authors contributed equally to this work.

† To whom correspondence should be addressed. Email: [icelab@berkeley.edu](mailto:icelab@berkeley.edu).

**SUPPLEMENTAL INFORMATION**

**SUPPLEMENTAL TABLE S1**

**SUPPLEMENTAL FIGURES S1, S2, S3 and S4**

**TABLE S1: Primers used in this study**

| PRIMER NAME        | SEQUENCE (5' → 3')                                              | DESCRIPTION                                                             |
|--------------------|-----------------------------------------------------------------|-------------------------------------------------------------------------|
| <b>CLONING</b>     |                                                                 |                                                                         |
| kanR-F/BamHI       | TTGTAGTAGGATCCTGTGTGAAATTGTTATCCG                               | Construction of pFXF <sub>kan</sub> and generating southern-blot probe  |
| kanR-R/BamHI       | TTGTCGTTGGATCCTACTGGGCTATCTGGACAAG                              |                                                                         |
| PD1617-F/HindIII   | TTGTAGTAAAGCTTGCTATTCCTGAAGGCGTCAATG                            | Construction of pFXF1, <i>ealXF</i> deletion vector                     |
| PD1617-R/XbaI      | TTGTAGTATCTAGACGATAAGAGTCCAACAACGTTTC                           |                                                                         |
| PD1616-F/KpnI      | TTGTAGTAGGTACCGTGGTGTGGATATGGCTCAAGGC                           |                                                                         |
| PD1616-R/EcoRI     | TTGTAGTAGAATTCATTGCGTGAGATCGAGTGACC                             |                                                                         |
| 1617COMP-F/SaII    | TTGTAGTAGTCGACGCCGTTACTGTGTTGCTATTCC                            | Construction of pFXF2, <i>ealXF</i> complementation vector              |
| 1617COMP-R/HindIII | TTGTAGTAAAGCTTCAAAAAGTCGCACACCTCG                               |                                                                         |
| PD0754-F/PstI      | ATTGTAGTACTGCAGTCACAAGGAGAAAAACAACCCTG                          | Construction of pFXF3, <i>clp</i> deletion vector                       |
| PD0754-R/XbaI      | TTGTAGTATCTAGAGTAGTGTCCCTATAGTCATATTAG                          |                                                                         |
| IG-F/SacI          | TTGTAGTAGAGCTCGTTGTTCTGTACGGAACGCGTTG                           |                                                                         |
| IG-R/ExoRI         | TTGTAGTAGAATTCACGCATTGCATTACTCATTGATAG                          |                                                                         |
| EALdom(HindIII)    | TTGTAGTAAAGCTTAGAGGAAGCCCATCATGCAGCGATGT<br>GAATTCTTTGTCTGCTATC | Cloning of the EAL domain encoding region of <i>eal</i> into pBBR1MCS-2 |
| EALdom(EcoRI)      | TTGTAGTAGAATTCAGTCATCGGGATGCATACTGCGATTG                        |                                                                         |
| <b>qPCR</b>        |                                                                 |                                                                         |
| <i>rpoD</i>        | GGCTTGAGCGAGGTACAAG<br>CGTCAACCTCAACAATGGAC                     | Endogenous control gene 1                                               |
| <i>rpsO</i>        | CAGGTTGCACTGTTGACGGC<br>AAAAGACCACGGCGACTATG                    | Endogenous control gene 2                                               |
| <i>ealXF</i>       | AATTGGCACTGGCCACTATG<br>CACATCATGCGAAGGATCAC                    | Tested genes                                                            |
| <i>cgsA</i>        | TGTTTGCTGGTGA CTCTGG<br>ATCAATATCGCGCTCCAATC                    |                                                                         |
| <i>rpfG</i>        | TGAAACCGTCTCCCGTTTAG                                            |                                                                         |

|              |                                                |  |
|--------------|------------------------------------------------|--|
|              | GTCGCACCTCTTCCTCAGAC                           |  |
| <i>hxfB</i>  | ACACCCACAGCTCCCCTACTAC<br>TACCGGCAGCATCTACGTTG |  |
| <i>fimA</i>  | CGCTGCATCGGTGGCTGGAG<br>GTAACACCTTCAACGGACTCG  |  |
| <i>gumJ</i>  | TATCGGTTATCGGCTTGGTC<br>CGGAACAATCACATGCAAC    |  |
| <i>pilYI</i> | TAACAGCGACATTTGCAAGC<br>CTCACACCCACACCAGACAC   |  |

**SUPPLEMENTAL FIGURES****Fig. S1**

Analysis of kanamycin resistance gene (*aph(3')*II) copy numbers in genomes of *X. fastidiosa* wild type, *rpfF* mutant and *eal* mutant strains by southern blot hybridization. Genomic DNA was digested with *EcoRI* to generate, in addition to various length genomic fragments, a ~4.5 Kbp genomic fragment harboring the *eal::kanR* allele. The digestion products were then separated by electrophoresis and probed with a *kanR* specific DNA probe generated by PCR using pBBR1MCS-2 as a template and the primers described in Table S1.

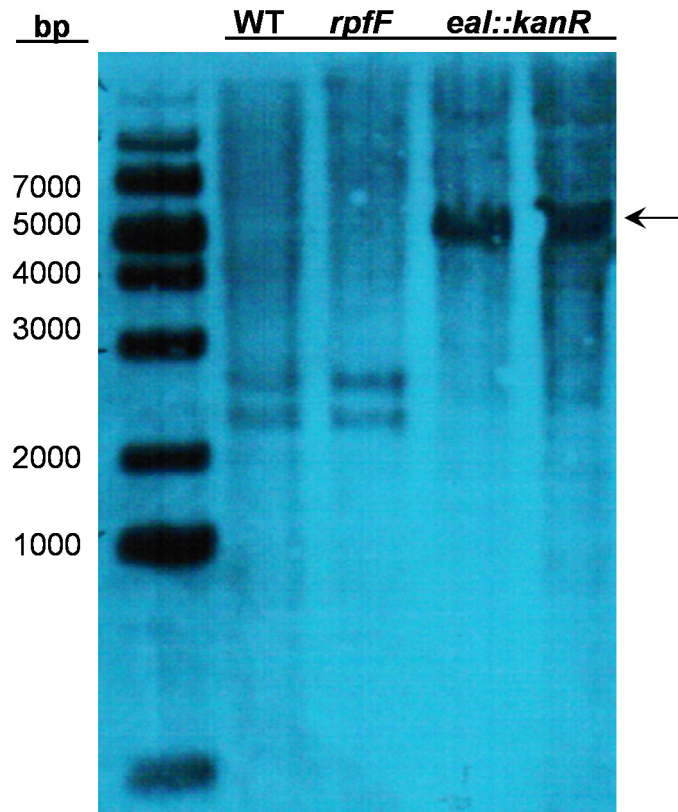

**Fig. S2**

Reversion of the hyper-motile phenotype of an *eal* mutant of *X. fastidiosa* by expression of *eal* from its native promoter *in-trans*. The *eal* gene was cloned into pBBR1MCS-5 and transformed into the *eal* mutant.

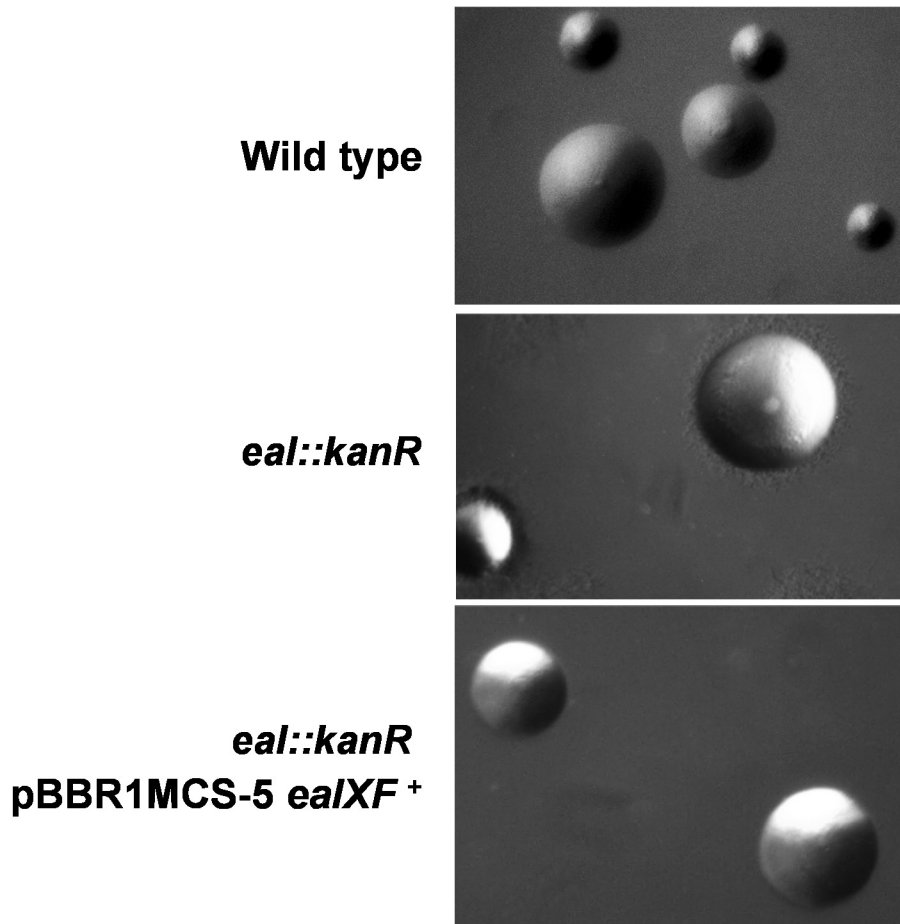

**Fig. S3**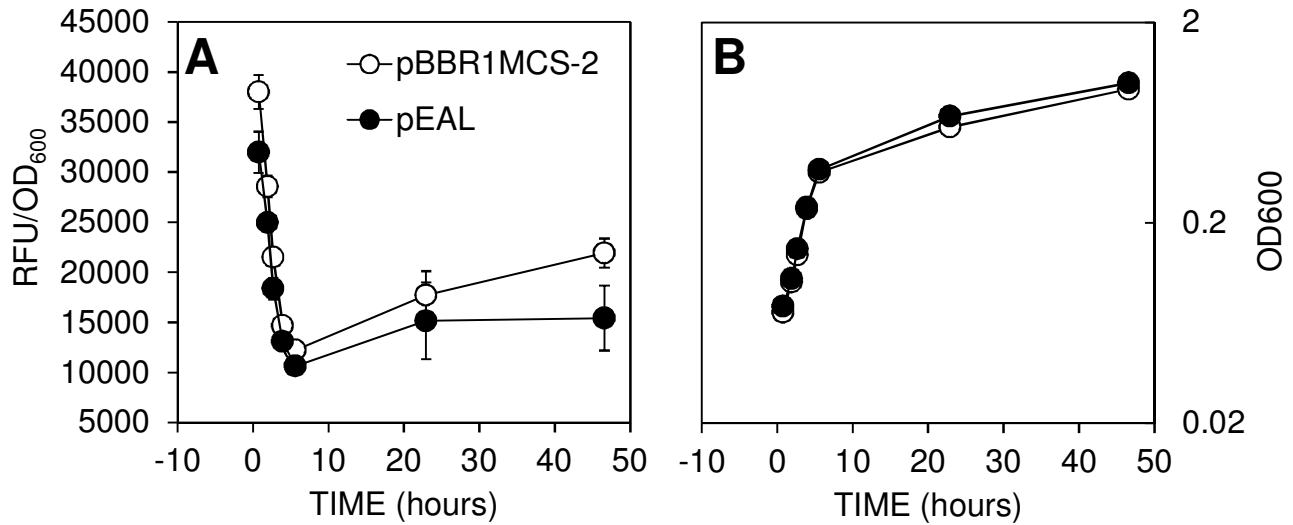

Verification of *X. fastidiosa* Eal cyclic di-GMP phosphodiesterase activity. The EAL domain of Eal (see Fig. 1) was cloned into pBBR1MCS-2 (pEAL) under the control of the *lacZ* promoter and expressed in *P. aeruginosa* PAO1  $\Delta pel \Delta psl$  double mutant harboring a chromosomal-based cyclic di-GMP responsive transcriptional fusion *cdrA'::gfp* (29). (A) Gfp activity. (B) Growth curve. At T=0 h, colonies grown on LB broth supplemented with kanamycin and gentamycin were suspended in ABTG+casA broth to an OD<sub>600</sub> = 0.05 and incubated in a 48-well microtiter plate on 37°C (static).

**Fig. S4**

Effect of tobramycin on growth and biofilm formation of the wild type *X. fastidiosa* strain. Cells were incubated for 7 days. Cell density was measured after homogenization by vigorously pipetting. Biofilm formation was measured by removing the planktonic cells and staining with crystal violet. Significant inhibition of growth occurs upon exposure to concentrations  $\geq 5$   $\mu\text{g/ml}$ .

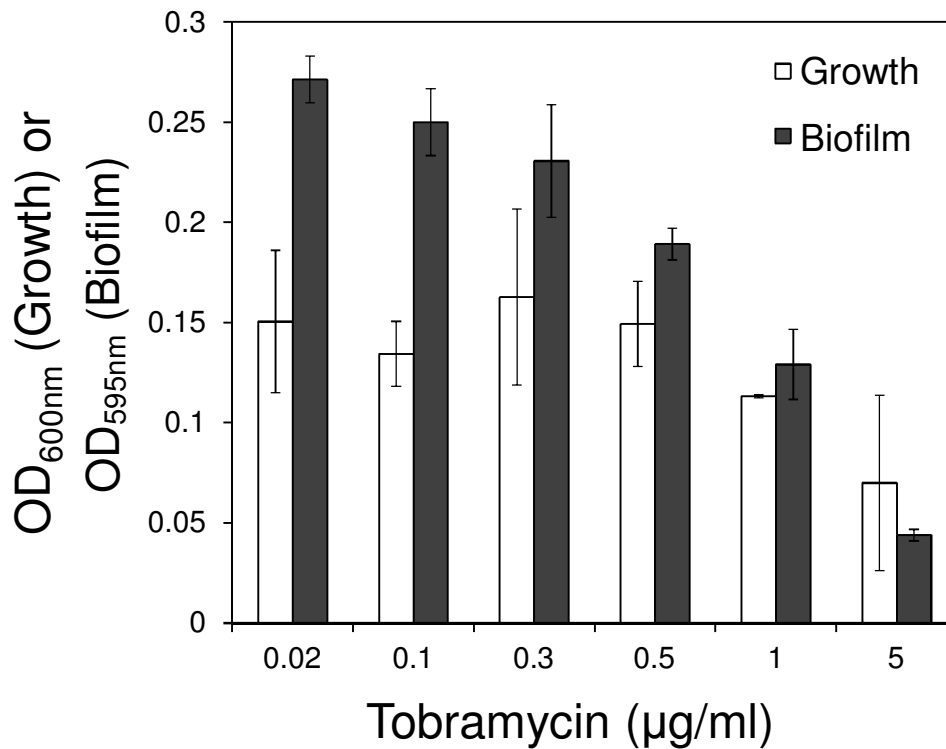

Supplement: AEM.03834-12_zam999104407so1.pdf [file AEM.03834-12_zam999104407so1.pdf]
